# Supplementary material for: Liposome–exosome hybrids for in situ detection of exosomal miR-1246 in breast cancer
Source: Royal Society of Chemistry journal article supplement (doi:10.1039/d3an01600e), 2023-11-22
Supplement: d3an01600e1.pdf [file d3an01600e1.pdf]

## **Liposome-exosome hybrids for in situ detection of exosomal miR-1246 in breast cancer**

Xuting Zhou<sup>a, d</sup>, Wenting Tang<sup>a</sup>, Yan Zhang<sup>c</sup>, Yuehua Guo<sup>b, \*</sup>, Li Qian<sup>a, \*</sup>

<sup>a</sup> *Department of Oncology, Affiliated Hospital of Nantong University, Medical School of Nantong University, Nantong, 226000, China. E-mail: ntqianli@163.com*

<sup>b</sup> *Research Center of Clinical Medicine, Affiliated Hospital of Nantong University, Nantong, 226000, China. E-mail: guoyuehuanju@163.com*

<sup>c</sup> *Department of Laboratory Medicine, Affiliated Hospital of Nantong University, Nantong, 226001, China*

<sup>d</sup> *Department of Oncology, Nantong Third People's Hospital, Affiliated Nantong Hospital 3 of Nantong University, Nantong, 226006, China*

\*Corresponding author

*E-mail address: guoyuehuanju@163.com (Y. Guo); ntqianli@163.com (L. Qian)*

### Table of contents

1. Table S1. Sequences of oligonucleotides used in this work
2. TEM images of liposome-exosome hybrids.
3. Expression of miR-1246 in MCF-7 exosomes and MCF-10A exosomes
4. Table S2. The TNM stage of patients.

1. Table S1. Sequences of oligonucleotides used in this work.

| Name         | Sequence (from 5' to 3')                                           |
|--------------|--------------------------------------------------------------------|
| crRNA        | GGA CCA CCC CAA AAA UGA AGG GGA CCA AAA CCC<br>UCU CCA AAA UCC AUU |
| Reporter RNA | FAM-UUUUU-BHQ1                                                     |
| Random RNA   | UUG UAC UAC ACA AAA GUA CUG                                        |
| miR-1246     | AAU GGA UUU UUG GAG CAG G                                          |
| miR-21       | UAG CUU AUC AGA CUG AUG UUG A                                      |
| miR-122      | UGG AGU GUG ACA AUG GUG UUU G                                      |

2. TEM images with more liposome-exosome hybrids.

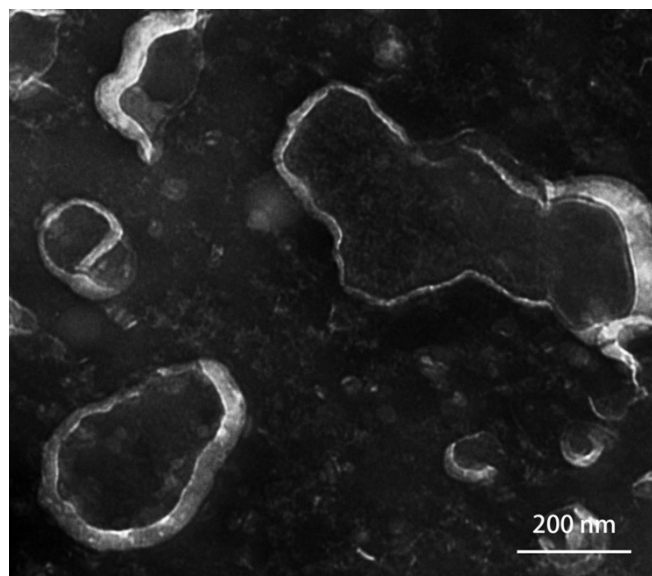

**Fig. S1** TEM images with more liposome-exosome hybrids.

### 3. Expression of miR-1246 in MCF-7 exosomes and MCF-10A exosomes

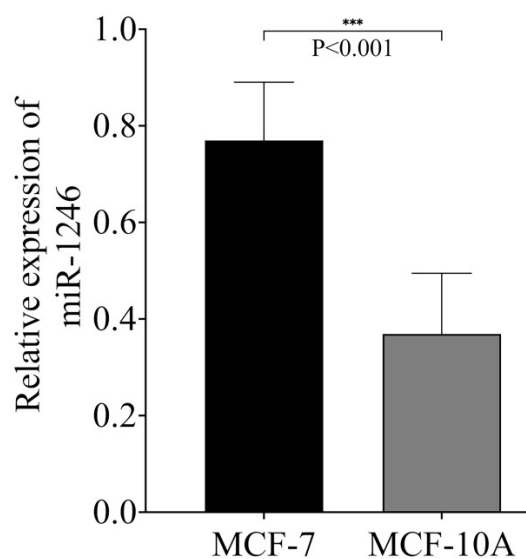

**Fig. S2.** Detection of the expression of miR-1246 in MCF-7 exosomes and MCF-10A exosomes by real-time q-PCR (\*\*\*p < 0.001).

### 4. Table S2. The TNM stage of patients.

| Patient | TNM stage                                    | Clinical stage | Patient | TNM stage                                    | Clinical stage |
|---------|----------------------------------------------|----------------|---------|----------------------------------------------|----------------|
| 1       | T <sub>3</sub> N <sub>2</sub> M <sub>1</sub> | IV             | 21      | T <sub>1</sub> N <sub>1</sub> M <sub>0</sub> | II             |
| 2       | T <sub>2</sub> N <sub>0</sub> M <sub>1</sub> | IV             | 22      | T <sub>2</sub> N <sub>0</sub> M <sub>0</sub> | II             |
| 3       | T <sub>1</sub> N <sub>2</sub> M <sub>1</sub> | IV             | 23      | T <sub>2</sub> N <sub>2</sub> M <sub>1</sub> | IV             |
| 4       | T <sub>2</sub> N <sub>2</sub> M <sub>1</sub> | IV             | 24      | T <sub>3</sub> N <sub>2</sub> M <sub>1</sub> | IV             |
| 5       | T <sub>2</sub> N <sub>1</sub> M <sub>1</sub> | IV             | 25      | T <sub>2</sub> N <sub>1</sub> M <sub>1</sub> | IV             |
| 6       | T <sub>2</sub> N <sub>0</sub> M <sub>1</sub> | IV             | 26      | T <sub>2</sub> N <sub>2</sub> M <sub>1</sub> | IV             |
| 7       | T <sub>1</sub> N <sub>0</sub> M <sub>0</sub> | I              | 27      | T <sub>3</sub> N <sub>1</sub> M <sub>1</sub> | IV             |
| 8       | T <sub>1</sub> N <sub>2</sub> M <sub>1</sub> | IV             | 28      | T <sub>3</sub> N <sub>3</sub> M <sub>0</sub> | III            |
| 9       | T <sub>2</sub> N <sub>2</sub> M <sub>1</sub> | IV             | 29      | T <sub>2</sub> N <sub>2</sub> M <sub>1</sub> | IV             |
| 10      | T <sub>2</sub> N <sub>2</sub> M <sub>1</sub> | IV             | 30      | T <sub>2</sub> N <sub>0</sub> M <sub>0</sub> | II             |
| 11      | T <sub>3</sub> N <sub>1</sub> M <sub>1</sub> | IV             | 31      | T <sub>3</sub> N <sub>1</sub> M <sub>0</sub> | III            |
| 12      | T <sub>3</sub> N <sub>1</sub> M <sub>1</sub> | IV             | 32      | T <sub>1</sub> N <sub>0</sub> M <sub>0</sub> | I              |
| 13      | T <sub>2</sub> N <sub>2</sub> M <sub>0</sub> | III            | 33      | T <sub>2</sub> N <sub>0</sub> M <sub>0</sub> | II             |
| 14      | T <sub>2</sub> N <sub>0</sub> M <sub>0</sub> | II             | 34      | T <sub>1</sub> N <sub>0</sub> M <sub>0</sub> | I              |
| 15      | T <sub>1</sub> N <sub>0</sub> M <sub>0</sub> | I              | 35      | T <sub>2</sub> N <sub>3</sub> M <sub>1</sub> | IV             |
| 16      | T <sub>1</sub> N <sub>1</sub> M <sub>0</sub> | II             | 36      | T <sub>1</sub> N <sub>0</sub> M <sub>0</sub> | I              |
| 17      | T <sub>3</sub> N <sub>2</sub> M <sub>1</sub> | IV             | 37      | T <sub>2</sub> N <sub>1</sub> M <sub>1</sub> | IV             |
| 18      | T <sub>2</sub> N <sub>2</sub> M <sub>1</sub> | IV             | 38      | T <sub>3</sub> N <sub>2</sub> M <sub>1</sub> | IV             |
| 19      | T <sub>4</sub> N <sub>1</sub> M <sub>0</sub> | III            | 39      | T <sub>2</sub> N <sub>2</sub> M <sub>1</sub> | IV             |
| 20      | T <sub>2</sub> N <sub>1</sub> M <sub>1</sub> | IV             | 40      | T <sub>1</sub> N <sub>0</sub> M <sub>0</sub> | I              |
